# Supplementary material
Source: PubMed Central journal article supplement (PMC5814984)
Supplement: jamacardiol-2-498-s001.pdf [file jamacardiol-2-498-s001.pdf]

## Supplementary Online Content

Alexander T, Mulasari AS, Joseph G, et al. A system of care for patients with ST-elevation myocardial infarction in India: The Tamil Nadu–ST-Segment Elevation Myocardial Infarction Program. *JAMA Cardiol*. Published online March 8, 2016. doi:10.1001/jamacardio.2016.5977

**eFigure 1.** STEMI Information Technology Kit

**eFigure 2.** Four Hub Hospitals and Their Primary Spoke Centers (Including Dropouts With No Enrollment)

**eFigure 3.** Map of Tamil Nadu Showing the 4 PCI Hub Hospitals

**eTable 1.** PCI Hub Hospitals in the TN-STEMI Program

**eTable 2.** List of Spoke Centers That Contributed Patients to the Study and Their PIs in the TN-STEMI Program

**eTable 3.** Medication Prescription at Discharge

This supplementary material has been provided by the authors to give readers additional information about their work.

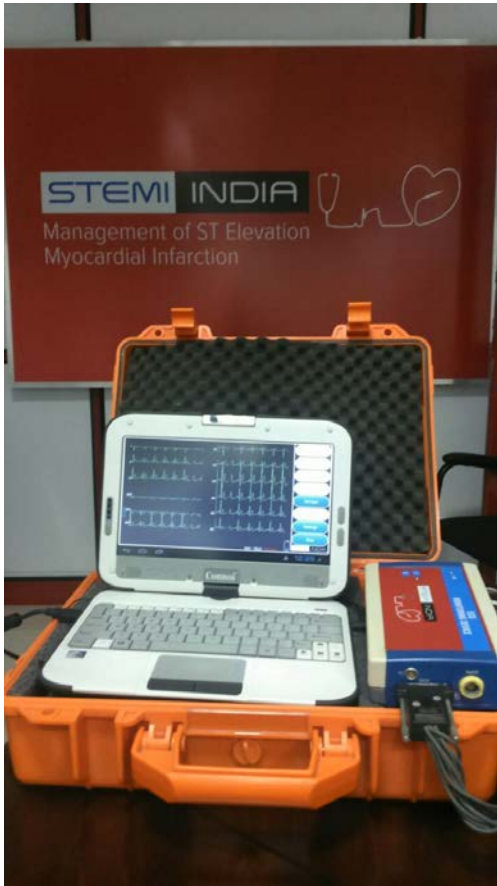

**eFigure 1.** STEMI Information Technology Kit

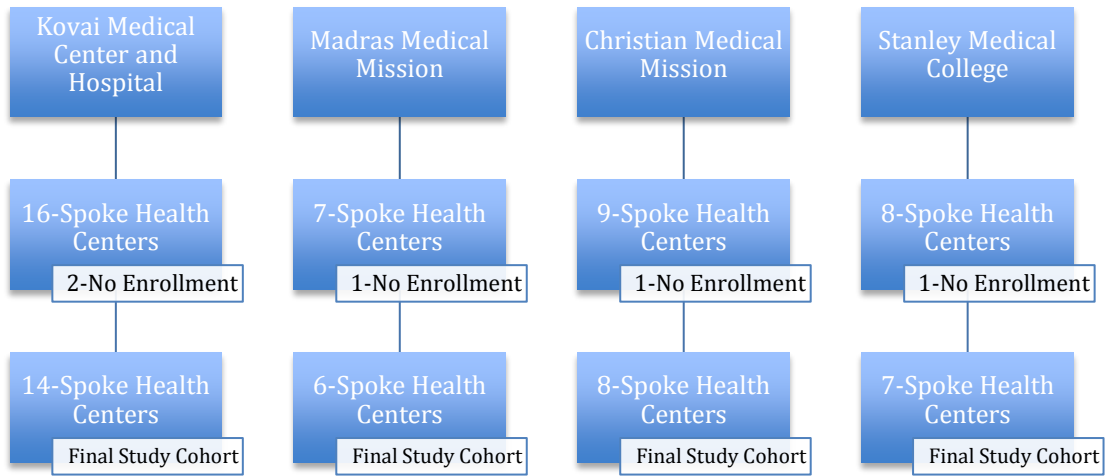

**eFigure 2.** Four Hub Hospitals and Their Primary Spoke Centers (Including Dropouts With No Enrollment)

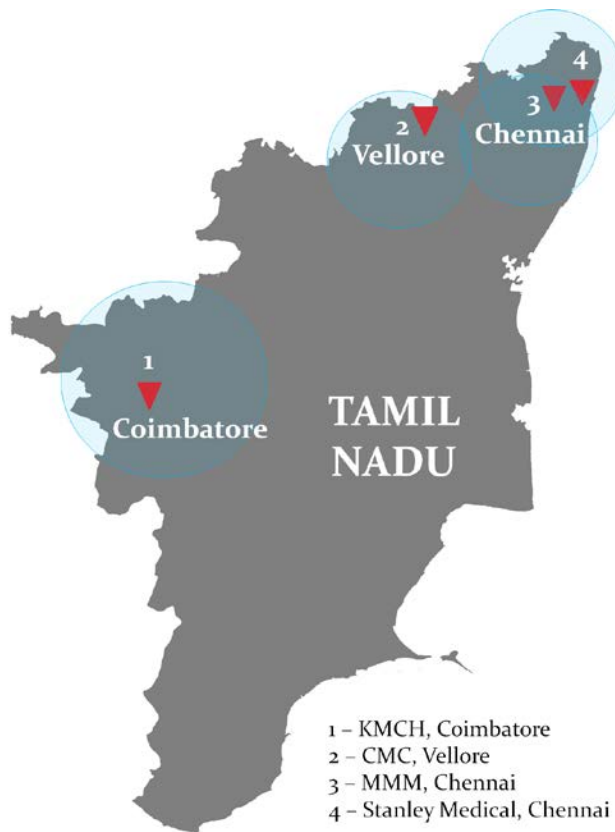

**eFigure 3.** Map of Tamil Nadu Showing the 4 PCI Hub Hospitals

KMCH=Kovai Medical Center and Hospital; CMC=Christian Medical College;

MMM=Madras Medical Mission

**eTable 1.** PCI Hub Hospitals in the TN-STEMI Program

| S. No | Name of the Hospital               | Location   | Name of the PI                                                                                                                                                                                           |
|-------|------------------------------------|------------|----------------------------------------------------------------------------------------------------------------------------------------------------------------------------------------------------------|
| 1.    | Stanley Medical College Hospital   | Chennai    | Dr. Kumaresan Kannan<br>Dr. Justin Paul Gnararaj<br>Vigna Prasad                                                                                                                                         |
| 2.    | Madras Medical Mission Hospital    | Chennai    | Dr. Ajit S Mulasari<br>Dr. Suma M Victor<br>Dr. Vijaykumar Subban<br>Dr. Latchumanadhas Kalidoss<br>Dr. Ulhas M. Pandurangi<br>Dr. Ezhilan Janakiraman<br>Dr. Jaishankar Krishnamoorthy<br>Kamaleswari K |
| 3.    | Christian Medical College Hospital | Vellore    | Dr. George Joseph<br>Dr. Viji Samuel Thomson<br>Dr. Sujith Thomas Chacko<br>Dr. Anoop George Alex<br>Dr. Anandaroop Lahiri<br>P. Sabitha<br>Jackson. J                                                   |
| 4.    | Kovai Medical Center and Hospital  | Coimbatore | Dr. Thomas Alexander<br>Dr. Ganesh Veerasekar<br>Dr. Sureshkumar R<br>Dr. D. M. T. Saravanan<br>Dr. K. Chockalingam<br>Dr. Venkatesh Babu<br>Karthikeyan. T                                              |

**eTable 2.** List of Spoke Centers That Contributed Patients to the Study and Their PIs in the TN-STEMI Program

| S.No | Hospital Name                            | Location                    | Investigator                                |
|------|------------------------------------------|-----------------------------|---------------------------------------------|
| 1    | Coimbatore Medical College and Hospital  | Coimbatore                  | Dr. Ravi Kumar.T                            |
| 2    | Christian Fellowship Hospital            | Oddanchatram, Dindigul      | Dr. Anand Vimal Dev.D                       |
| 3    | Pollachi Cardiac Center                  | Pollachi, Coimbatore        | Dr. Ramakrishnan. S                         |
| 4    | Sri Kuppuswamy Hospital                  | Vellakoil, Tirupur          | Dr. Sathiyamoorthy.V                        |
| 5    | TMF Hospital                             | Tirupur                     | Dr. Prabhu Ram. J                           |
| 6    | Amaravathy Hospital                      | Karur                       | Dr.M.S.Senthil Kumar                        |
| 7    | Government Hospital                      | Udumalpet, Tirupur          | Dr. Vanaja.S                                |
| 8    | Government Hospital                      | Tirupur                     | Dr. Bharathi.P                              |
| 9    | SAS Clinic Cardiac Center                | Dharapuram, Tirupur         | Dr. Prabhu Venkatesh.S                      |
| 10   | Government Hospital                      | Ooty, Nilgiris              | Dr. Sreedhar.R                              |
| 11   | Government Hospital                      | Dharapuram, Tirupur         | Dr.Periyasamy.N                             |
| 12   | Sri Kumaran Hospital                     | Tirupur                     | Dr. Thirumurugan.R                          |
| 13   | RVS Multi-Speciality Hospital            | Sulur, Coimbatore           | Dr.Natarajan.V.M                            |
| 14   | ESI                                      | Kurichi,Coimbatore          | Dr. S. Arun                                 |
| 15   | Venkateswara Hospital                    | Chinniyampalayam,Coimbatore | Dr.Gurusamy.R                               |
| 16   | Chander Nursing Home                     | Avinashi, Tirupur           | Dr.Yogeta.B                                 |
| 17   | Government Hospital                      | Tambaram, Chennai           | Dr.Anne Princy .S                           |
| 18   | Sundaram Medical Foundation Hospital     | Anna Nagar, Chennai         | Dr.Vindya .M/<br>Dr.Privalavan .R           |
| 19   | Government Hospital                      | Kancheepuram                | Dr.Abirami .G                               |
| 20   | Velammal Hospital                        | Mogappair East, Chennai     | Dr.Liaqath Hussain .T                       |
| 21   | Dr. Mohan's Diabetes Specialities Center | Gopalapuram, Chennai        | Dr.Mohan .V                                 |
| 22   | Government Hospital                      | Tirutani, Thiruvallur       | Dr.B. Lakshmi Narasimhan                    |
| 23   | Government Hospital                      | Royapettah, Chennai         | Dr.Nandakumaran .M                          |
| 24   | Sugam Hospital                           | Thiruvotriyur, Chennai      | Dr.Mohamed Rabeek .J<br>Dr.Hemanayakalu .TR |
| 25   | Government Hospital                      | Thiruvallur                 | Dr. Anna Lakshmi                            |
| 26   | Government Hospital                      | Arakkonam, Vellore          | Dr. Sheik Alavudeen                         |
| 27   | CSI Rainy Hospital                       | Old Washermanpet, Chennai   | Dr.Vijay Antony Prabhu                      |

|    |                                            |                         |                       |
|----|--------------------------------------------|-------------------------|-----------------------|
|    |                                            |                         | Dr.Sheeba.R           |
| 28 | CSI Kalyani Hospital                       | Mylapore, Chennai       | Dr.J.Jayanth          |
| 29 | Vellore Medical College Hospital           | Adukkamparai, Vellore   | Dr. Thirumal Babu. K  |
| 30 | Sri Narayani Hospital &<br>Research Center | Thirumalaikodi, Vellore | Dr. V. Vatchsala Sree |
| 31 | CHAD Hospital                              | Bagayam, Vellore        | Dr. Reginald Alex     |
| 32 | Government Hospital,<br>Walajapet          | Sholingur, Vellore      | Dr. Bijin Oliver John |
| 33 | Scudder Memorial Hospital                  | Ranipet, Vellore        | Dr. Rup Solomon       |
| 34 | Government Hospital                        | Thirupattur, Vellore    | Dr. Manoj Kumar. K    |
| 35 | RUSHA Hospital                             | Thorapadi, Vellore      | Dr. Kumaran           |

**eTable 3.** Medication Prescription at Discharge

| <b>Medications</b> | <b>Pre-Implementation Phase (%)</b> | <b>Post-Implementation Phase (%)</b> | <b>P Value</b> |
|--------------------|-------------------------------------|--------------------------------------|----------------|
| Aspirin            | 59.2                                | 82.3                                 | <0.0001        |
| Statin             | 62.6                                | 76.5                                 | <0.0001        |
| Clopidogrel        | 57.6                                | 64.1                                 | <0.0001        |
| Prasugrel          | 3.7                                 | 15.8                                 | <0.0001        |
| Ticagrelor         | 3.2                                 | 11.8                                 | <0.0001        |
